# Supplementary material for: Comparison of urine proteomes from tumor-bearing mice with those from tumor-resected mice
Source: PeerJ. 2023 Jan 25;11:e14737. doi: 10.7717/peerj.14737 (PMC9884041; doi:10.7717/peerj.14737)
Supplement: Supplemental Information 1 [file peerj-11-14737-s001.xlsx]

## Sheet: D7
tumor-resected vs tumor-bearing D7
蛋白ID	出现次数
P19221	13
Q61646	12
Q00993	10
P18761	8
P81117	8
Q05793	8
Q80X71	8
Q9EP95	8
Q61398	8
Q9Z0K7	8
P25119	8
Q922U2	8
O35657	7
P00687	7
Q6PDN3	7
A2BIM8;P02762;P04938	7
Q9JJS0	7
P09470	7
Q4KML4	7
Q61781	7
Q8K1H9	7
Q7TMJ8	7
O88968	7
Q91XA9	7
O09051	6
P05533	6
P0CG49;P0CG50;P62983;P62984	6
Q07797	6
Q60590	6
Q91X17	6
Q9Z0J0	6
P60710;P63260	6
P02535	6
Q3TTY5	6
Q6NXH9	6
P09036	6
Q9JHY3	6
Q921W8	6
P51437	6
P29533	5
Q5FW60	5
P01837	5
P11588	5
P70269	5
Q91WV7	5
P23780	5
P34927	5
P04186	4
Q7TMR0	4
Q91VW3	4
Q9D3H2	4
P11438	4
Q01279	4
O08997	4
P03953	4
P01887	4
P06869	3
P15947	3
Q9ESD1	3
O09043	3
Q02596	3
Q61129	3
P97426	3
P04104	3
P11589	3
P11591	3
Q08423	3
Q61271	3
P11859	3
Q9Z0M9	3
P20060	3
P49935	3
O88338	3
O88188	2
P01898	2
Q06890	2
Q61847	2
Q8K4G1	2
P0CW02	1
Q62266	1
Q03404	1
Q60847	1
Q02819	1
Q8VED5	1
Q61147	1
P18181	1
P56386	1
Q00898	1
C0HKG5;C0HKG6	1
Q8C6C9	1
P07361	1
O09133	1
P02816	1
P13597	1
A2AEP0	0
A2ARV4	0
O08677	0
O09114	0
O09159	0
O54782	0
O55186	0
O70570	0
O89020	0
P00688	0
P01132	0
P01665;P01666	0
P04925	0
P07309	0
P07724	0
P07758;Q00896	0
P07759	0
P08228	0
P09803	0
P10605	0
P11276	0
P13020	0
P13634	0
P16675	0
P17047	0
P20918	0
P22599	0
P28798	0
P28825	0
P35459	0
P41272	0
P47878	0
P49183	0
P55292	0
P70699	0
P97300	0
Q00897	0
Q01339	0
Q07456	0
Q61207	0
Q61581	0
Q61838	0
Q64729	0
Q8BFR4	0
Q8BND5	0
Q8R242	0
Q91V08	0
Q91WR8	0
Q91X72	0
Q921I1	0
Q9DAU7	0
Q9ET22	0
Q9ET66	0
Q9JHY4	0
Q9JI02	0
Q9JLB4	0
Q9JM99	0
Q9R1E6	0
Q9WTR5	0

## Sheet: D7 (2)
tumor-resected vs tumor-bearing D7
随机组合情况	Group1	Group2	按照条件筛选后的差异的个数	差异蛋白ID
1	18-D2,19-D2,20-D2,21-D2,22-D2	1-D2,2-D2,3-D2,4-D2,5-D2	20	O09051,O35657,P00687,P05533,P06869,P0CG49;P0CG50;P62983;P62984,P0CW02,P15947,P18761,P29533,P81117,Q05793,Q07797,Q60590,Q62266,Q80X71,Q91X17,Q9EP95,Q9ESD1,Q9Z0J0
2	18-D2,19-D2,20-D2,21-D2,1-D2	22-D2,2-D2,3-D2,4-D2,5-D2	8	P00687,P0CG49;P0CG50;P62983;P62984,Q5FW60,Q60590,Q61398,Q6PDN3,Q9Z0J0,Q9Z0K7
3	18-D2,19-D2,20-D2,21-D2,2-D2	22-D2,1-D2,3-D2,4-D2,5-D2	6	O09043,O35657,P18761,Q61646,Q6PDN3,Q80X71
4	18-D2,19-D2,20-D2,21-D2,3-D2	22-D2,1-D2,2-D2,4-D2,5-D2	6	O35657,P04186,P19221,P81117,Q00993,Q80X71
5	18-D2,19-D2,20-D2,21-D2,4-D2	22-D2,1-D2,2-D2,3-D2,5-D2	4	O35657,P18761,Q03404,Q6PDN3
6	18-D2,19-D2,20-D2,21-D2,5-D2	22-D2,1-D2,2-D2,3-D2,4-D2	5	O35657,P18761,P81117,Q80X71,Q91X17
7	18-D2,19-D2,20-D2,22-D2,1-D2	21-D2,2-D2,3-D2,4-D2,5-D2	8	A2BIM8;P02762;P04938,O88188,P0CG49;P0CG50;P62983;P62984,Q5FW60,Q60590,Q91X17,Q9Z0J0,Q9Z0K7
8	18-D2,19-D2,20-D2,22-D2,2-D2	21-D2,1-D2,3-D2,4-D2,5-D2	4	O35657,P60710;P63260,Q61646,Q80X71
9	18-D2,19-D2,20-D2,22-D2,3-D2	21-D2,1-D2,2-D2,4-D2,5-D2	3	O09051,P01837,P81117
10	18-D2,19-D2,20-D2,22-D2,4-D2	21-D2,1-D2,2-D2,3-D2,5-D2	3	O09051,P18761,Q91X17
11	18-D2,19-D2,20-D2,22-D2,5-D2	21-D2,1-D2,2-D2,3-D2,4-D2	3	P81117,Q80X71,Q91X17
12	18-D2,19-D2,20-D2,1-D2,2-D2	21-D2,22-D2,3-D2,4-D2,5-D2	6	P25119,Q02596,Q60847,Q61129,Q6PDN3,Q9JJS0
13	18-D2,19-D2,20-D2,1-D2,3-D2	21-D2,22-D2,2-D2,4-D2,5-D2	1	Q00993
14	18-D2,19-D2,20-D2,1-D2,4-D2	21-D2,22-D2,2-D2,3-D2,5-D2	5	P25119,Q02596,Q6PDN3,Q7TMR0,Q91VW3
15	18-D2,19-D2,20-D2,1-D2,5-D2	21-D2,22-D2,2-D2,3-D2,4-D2	3	P97426,Q02596,Q91VW3
16	18-D2,19-D2,20-D2,2-D2,3-D2	21-D2,22-D2,1-D2,4-D2,5-D2	1	Q61646
17	18-D2,19-D2,20-D2,2-D2,4-D2	21-D2,22-D2,1-D2,3-D2,5-D2	3	P01898,P18761,Q02819
18	18-D2,19-D2,20-D2,2-D2,5-D2	21-D2,22-D2,1-D2,3-D2,4-D2	1	P18761
19	18-D2,19-D2,20-D2,3-D2,4-D2	21-D2,22-D2,1-D2,2-D2,5-D2	1	P09470
20	18-D2,19-D2,20-D2,3-D2,5-D2	21-D2,22-D2,1-D2,2-D2,4-D2	2	P81117,Q00993
21	18-D2,19-D2,20-D2,4-D2,5-D2	21-D2,22-D2,1-D2,2-D2,3-D2	3	P01898,P18761,Q4KML4
22	18-D2,19-D2,21-D2,22-D2,1-D2	20-D2,2-D2,3-D2,4-D2,5-D2	23	A2BIM8;P02762;P04938,P00687,P02535,P04104,P09470,P0CG49;P0CG50;P62983;P62984,P11588,P11589,P11591,P29533,P70269,Q08423,Q3TTY5,Q5FW60,Q60590,Q61398,Q61781,Q6NXH9,Q8VED5,Q91WV7,Q922U2,Q9Z0J0,Q9Z0K7
23	18-D2,19-D2,21-D2,22-D2,2-D2	20-D2,1-D2,3-D2,4-D2,5-D2	0
24	18-D2,19-D2,21-D2,22-D2,3-D2	20-D2,1-D2,2-D2,4-D2,5-D2	3	O09051,Q07797,Q61271
25	18-D2,19-D2,21-D2,22-D2,4-D2	20-D2,1-D2,2-D2,3-D2,5-D2	4	O09051,P29533,Q61781,Q922U2
26	18-D2,19-D2,21-D2,22-D2,5-D2	20-D2,1-D2,2-D2,3-D2,4-D2	9	P02535,P81117,Q3TTY5,Q61147,Q61781,Q6NXH9,Q91X17,Q922U2,Q9ESD1
27	18-D2,19-D2,21-D2,1-D2,2-D2	20-D2,22-D2,3-D2,4-D2,5-D2	7	P00687,P01837,P11588,P23780,Q61398,Q91WV7,Q9Z0K7
28	18-D2,19-D2,21-D2,1-D2,3-D2	20-D2,22-D2,2-D2,4-D2,5-D2	0
29	18-D2,19-D2,21-D2,1-D2,4-D2	20-D2,22-D2,2-D2,3-D2,5-D2	7	P04104,P29533,Q61398,Q91WV7,Q922U2,Q9D3H2,Q9Z0K7
30	18-D2,19-D2,21-D2,1-D2,5-D2	20-D2,22-D2,2-D2,3-D2,4-D2	7	P00687,P04104,Q3TTY5,Q61781,Q6NXH9,Q91VW3,Q922U2
31	18-D2,19-D2,21-D2,2-D2,3-D2	20-D2,22-D2,1-D2,4-D2,5-D2	0
32	18-D2,19-D2,21-D2,2-D2,4-D2	20-D2,22-D2,1-D2,3-D2,5-D2	0
33	18-D2,19-D2,21-D2,2-D2,5-D2	20-D2,22-D2,1-D2,3-D2,4-D2	0
34	18-D2,19-D2,21-D2,3-D2,4-D2	20-D2,22-D2,1-D2,2-D2,5-D2	1	P09036
35	18-D2,19-D2,21-D2,3-D2,5-D2	20-D2,22-D2,1-D2,2-D2,4-D2	0
36	18-D2,19-D2,21-D2,4-D2,5-D2	20-D2,22-D2,1-D2,2-D2,3-D2	1	Q922U2
37	18-D2,19-D2,22-D2,1-D2,2-D2	20-D2,21-D2,3-D2,4-D2,5-D2	6	A2BIM8;P02762;P04938,P11588,P19221,Q08423,Q9JJS0,Q9Z0K7
38	18-D2,19-D2,22-D2,1-D2,3-D2	20-D2,21-D2,2-D2,4-D2,5-D2	1	P11859
39	18-D2,19-D2,22-D2,1-D2,4-D2	20-D2,21-D2,2-D2,3-D2,5-D2	7	P02535,P19221,P34927,Q3TTY5,Q922U2,Q9Z0K7,Q9Z0M9
40	18-D2,19-D2,22-D2,1-D2,5-D2	20-D2,21-D2,2-D2,3-D2,4-D2	7	P02535,P11438,Q3TTY5,Q61781,Q6NXH9,Q922U2,Q9Z0K7
41	18-D2,19-D2,22-D2,2-D2,3-D2	20-D2,21-D2,1-D2,4-D2,5-D2	0
42	18-D2,19-D2,22-D2,2-D2,4-D2	20-D2,21-D2,1-D2,3-D2,5-D2	3	P60710;P63260,Q00993,Q9JHY3
43	18-D2,19-D2,22-D2,2-D2,5-D2	20-D2,21-D2,1-D2,3-D2,4-D2	1	Q01279
44	18-D2,19-D2,22-D2,3-D2,4-D2	20-D2,21-D2,1-D2,2-D2,5-D2	1	O09051
45	18-D2,19-D2,22-D2,3-D2,5-D2	20-D2,21-D2,1-D2,2-D2,4-D2	2	P20060,P81117
46	18-D2,19-D2,22-D2,4-D2,5-D2	20-D2,21-D2,1-D2,2-D2,3-D2	1	P02535
47	18-D2,19-D2,1-D2,2-D2,3-D2	20-D2,21-D2,22-D2,4-D2,5-D2	2	P11859,Q8K1H9
48	18-D2,19-D2,1-D2,2-D2,4-D2	20-D2,21-D2,22-D2,3-D2,5-D2	11	O08997,P03953,P18181,P19221,P23780,P25119,Q06890,Q4KML4,Q7TMJ8,Q7TMR0,Q9JJS0
49	18-D2,19-D2,1-D2,2-D2,5-D2	20-D2,21-D2,22-D2,3-D2,4-D2	6	P19221,P23780,P25119,Q07797,Q61847,Q9JJS0
50	18-D2,19-D2,1-D2,3-D2,4-D2	20-D2,21-D2,22-D2,2-D2,5-D2	1	Q921W8
51	18-D2,19-D2,1-D2,3-D2,5-D2	20-D2,21-D2,22-D2,2-D2,4-D2	2	Q8K1H9,Q921W8
52	18-D2,19-D2,1-D2,4-D2,5-D2	20-D2,21-D2,22-D2,2-D2,3-D2	10	O08997,P03953,P05533,P19221,P25119,P34927,P56386,Q4KML4,Q91VW3,Q921W8
53	18-D2,19-D2,2-D2,3-D2,4-D2	20-D2,21-D2,22-D2,1-D2,5-D2	1	P09470
54	18-D2,19-D2,2-D2,3-D2,5-D2	20-D2,21-D2,22-D2,1-D2,4-D2	3	O88968,Q00898,Q05793
55	18-D2,19-D2,2-D2,4-D2,5-D2	20-D2,21-D2,22-D2,1-D2,3-D2	2	P03953,Q4KML4
56	18-D2,19-D2,3-D2,4-D2,5-D2	20-D2,21-D2,22-D2,1-D2,2-D2	2	Q91XA9,Q921W8
57	18-D2,20-D2,21-D2,22-D2,1-D2	19-D2,2-D2,3-D2,4-D2,5-D2	15	A2BIM8;P02762;P04938,O88188,O88968,P01887,P09470,P0CG49;P0CG50;P62983;P62984,P11591,P15947,P70269,Q05793,Q5FW60,Q60590,Q91XA9,Q9EP95,Q9Z0J0
58	18-D2,20-D2,21-D2,22-D2,2-D2	19-D2,1-D2,3-D2,4-D2,5-D2	5	O09043,Q80X71,Q8K1H9,Q91XA9,Q921W8
59	18-D2,20-D2,21-D2,22-D2,3-D2	19-D2,1-D2,2-D2,4-D2,5-D2	12	C0HKG5;C0HKG6,O08997,P03953,P05533,P06869,P19221,P25119,Q06890,Q07797,Q4KML4,Q7TMJ8,Q9EP95
60	18-D2,20-D2,21-D2,22-D2,4-D2	19-D2,1-D2,2-D2,3-D2,5-D2	5	P15947,Q05793,Q8K1H9,Q8K4G1,Q9EP95
61	18-D2,20-D2,21-D2,22-D2,5-D2	19-D2,1-D2,2-D2,3-D2,4-D2	5	P06869,Q05793,Q80X71,Q8K1H9,Q9EP95
62	18-D2,20-D2,21-D2,1-D2,2-D2	19-D2,22-D2,3-D2,4-D2,5-D2	2	Q6PDN3,Q91XA9
63	18-D2,20-D2,21-D2,1-D2,3-D2	19-D2,22-D2,2-D2,4-D2,5-D2	2	Q00993,Q9JHY3
64	18-D2,20-D2,21-D2,1-D2,4-D2	19-D2,22-D2,2-D2,3-D2,5-D2	4	O88968,P20060,Q61398,Q6PDN3
65	18-D2,20-D2,21-D2,1-D2,5-D2	19-D2,22-D2,2-D2,3-D2,4-D2	2	O88968,P97426
66	18-D2,20-D2,21-D2,2-D2,3-D2	19-D2,22-D2,1-D2,4-D2,5-D2	1	P11438
67	18-D2,20-D2,21-D2,2-D2,4-D2	19-D2,22-D2,1-D2,3-D2,5-D2	0
68	18-D2,20-D2,21-D2,2-D2,5-D2	19-D2,22-D2,1-D2,3-D2,4-D2	0
69	18-D2,20-D2,21-D2,3-D2,4-D2	19-D2,22-D2,1-D2,2-D2,5-D2	3	P09036,P11438,P49935
70	18-D2,20-D2,21-D2,3-D2,5-D2	19-D2,22-D2,1-D2,2-D2,4-D2	3	P19221,Q00993,Q7TMJ8
71	18-D2,20-D2,21-D2,4-D2,5-D2	19-D2,22-D2,1-D2,2-D2,3-D2	0
72	18-D2,20-D2,22-D2,1-D2,2-D2	19-D2,21-D2,3-D2,4-D2,5-D2	5	A2BIM8;P02762;P04938,P11588,P51437,Q91XA9,Q9JJS0
73	18-D2,20-D2,22-D2,1-D2,3-D2	19-D2,21-D2,2-D2,4-D2,5-D2	1	O88338
74	18-D2,20-D2,22-D2,1-D2,4-D2	19-D2,21-D2,2-D2,3-D2,5-D2	1	O88968
75	18-D2,20-D2,22-D2,1-D2,5-D2	19-D2,21-D2,2-D2,3-D2,4-D2	1	O88968
76	18-D2,20-D2,22-D2,2-D2,3-D2	19-D2,21-D2,1-D2,4-D2,5-D2	1	Q9D3H2
77	18-D2,20-D2,22-D2,2-D2,4-D2	19-D2,21-D2,1-D2,3-D2,5-D2	2	Q8K1H9,Q9JHY3
78	18-D2,20-D2,22-D2,2-D2,5-D2	19-D2,21-D2,1-D2,3-D2,4-D2	2	Q01279,Q9D3H2
79	18-D2,20-D2,22-D2,3-D2,4-D2	19-D2,21-D2,1-D2,2-D2,5-D2	2	P01837,P49935
80	18-D2,20-D2,22-D2,3-D2,5-D2	19-D2,21-D2,1-D2,2-D2,4-D2	1	P01837
81	18-D2,20-D2,22-D2,4-D2,5-D2	19-D2,21-D2,1-D2,2-D2,3-D2	1	Q8K1H9
82	18-D2,20-D2,1-D2,2-D2,3-D2	19-D2,21-D2,22-D2,4-D2,5-D2	0
83	18-D2,20-D2,1-D2,2-D2,4-D2	19-D2,21-D2,22-D2,3-D2,5-D2	4	Q61129,Q7TMJ8,Q7TMR0,Q9JJS0
84	18-D2,20-D2,1-D2,2-D2,5-D2	19-D2,21-D2,22-D2,3-D2,4-D2	3	P97426,Q07797,Q61271
85	18-D2,20-D2,1-D2,3-D2,4-D2	19-D2,21-D2,22-D2,2-D2,5-D2	2	O88338,P49935
86	18-D2,20-D2,1-D2,3-D2,5-D2	19-D2,21-D2,22-D2,2-D2,4-D2	2	O88338,Q00993
87	18-D2,20-D2,1-D2,4-D2,5-D2	19-D2,21-D2,22-D2,2-D2,3-D2	2	P05533,Q4KML4
88	18-D2,20-D2,2-D2,3-D2,4-D2	19-D2,21-D2,22-D2,1-D2,5-D2	5	P02535,P11438,Q3TTY5,Q61781,Q6NXH9
89	18-D2,20-D2,2-D2,3-D2,5-D2	19-D2,21-D2,22-D2,1-D2,4-D2	2	P29533,Q9Z0M9
90	18-D2,20-D2,2-D2,4-D2,5-D2	19-D2,21-D2,22-D2,1-D2,3-D2	0
91	18-D2,20-D2,3-D2,4-D2,5-D2	19-D2,21-D2,22-D2,1-D2,2-D2	2	A2BIM8;P02762;P04938,P11589
92	18-D2,21-D2,22-D2,1-D2,2-D2	19-D2,20-D2,3-D2,4-D2,5-D2	10	A2BIM8;P02762;P04938,P01887,P09470,P11588,P51437,P70269,Q08423,Q61398,Q8C6C9,Q91XA9
93	18-D2,21-D2,22-D2,1-D2,3-D2	19-D2,20-D2,2-D2,4-D2,5-D2	1	P01887
94	18-D2,21-D2,22-D2,1-D2,4-D2	19-D2,20-D2,2-D2,3-D2,5-D2	6	O88968,P09470,Q05793,Q61398,Q61646,Q91WV7
95	18-D2,21-D2,22-D2,1-D2,5-D2	19-D2,20-D2,2-D2,3-D2,4-D2	9	P01887,P07361,P09470,P11591,P70269,Q05793,Q61646,Q61781,Q6NXH9
96	18-D2,21-D2,22-D2,2-D2,3-D2	19-D2,20-D2,1-D2,4-D2,5-D2	0
97	18-D2,21-D2,22-D2,2-D2,4-D2	19-D2,20-D2,1-D2,3-D2,5-D2	1	Q00993
98	18-D2,21-D2,22-D2,2-D2,5-D2	19-D2,20-D2,1-D2,3-D2,4-D2	1	Q01279
99	18-D2,21-D2,22-D2,3-D2,4-D2	19-D2,20-D2,1-D2,2-D2,5-D2	1	P09036
100	18-D2,21-D2,22-D2,3-D2,5-D2	19-D2,20-D2,1-D2,2-D2,4-D2	3	P25119,Q61129,Q7TMJ8
101	18-D2,21-D2,22-D2,4-D2,5-D2	19-D2,20-D2,1-D2,2-D2,3-D2	3	Q05793,Q61646,Q8K4G1
102	18-D2,21-D2,1-D2,2-D2,3-D2	19-D2,20-D2,22-D2,4-D2,5-D2	0
103	18-D2,21-D2,1-D2,2-D2,4-D2	19-D2,20-D2,22-D2,3-D2,5-D2	5	O09133,P01837,P02816,Q61398,Q91WV7
104	18-D2,21-D2,1-D2,2-D2,5-D2	19-D2,20-D2,22-D2,3-D2,4-D2	1	P23780
105	18-D2,21-D2,1-D2,3-D2,4-D2	19-D2,20-D2,22-D2,2-D2,5-D2	2	P09036,Q61646
106	18-D2,21-D2,1-D2,3-D2,5-D2	19-D2,20-D2,22-D2,2-D2,4-D2	2	P60710;P63260,Q61646
107	18-D2,21-D2,1-D2,4-D2,5-D2	19-D2,20-D2,22-D2,2-D2,3-D2	2	P60710;P63260,Q61646
108	18-D2,21-D2,2-D2,3-D2,4-D2	19-D2,20-D2,22-D2,1-D2,5-D2	1	P09036
109	18-D2,21-D2,2-D2,3-D2,5-D2	19-D2,20-D2,22-D2,1-D2,4-D2	1	Q9Z0M9
110	18-D2,21-D2,2-D2,4-D2,5-D2	19-D2,20-D2,22-D2,1-D2,3-D2	0
111	18-D2,21-D2,3-D2,4-D2,5-D2	19-D2,20-D2,22-D2,1-D2,2-D2	3	P09036,P60710;P63260,Q61646
112	18-D2,22-D2,1-D2,2-D2,3-D2	19-D2,20-D2,21-D2,4-D2,5-D2	2	P11859,P51437
113	18-D2,22-D2,1-D2,2-D2,4-D2	19-D2,20-D2,21-D2,3-D2,5-D2	9	P19221,P34927,P51437,Q00993,Q7TMJ8,Q7TMR0,Q91XA9,Q9JHY3,Q9JJS0
114	18-D2,22-D2,1-D2,2-D2,5-D2	19-D2,20-D2,21-D2,3-D2,4-D2	5	P04186,P19221,P51437,P70269,Q01279
115	18-D2,22-D2,1-D2,3-D2,4-D2	19-D2,20-D2,21-D2,2-D2,5-D2	0
116	18-D2,22-D2,1-D2,3-D2,5-D2	19-D2,20-D2,21-D2,2-D2,4-D2	0
117	18-D2,22-D2,1-D2,4-D2,5-D2	19-D2,20-D2,21-D2,2-D2,3-D2	5	P04186,P19221,P34927,P51437,Q61646
118	18-D2,22-D2,2-D2,3-D2,4-D2	19-D2,20-D2,21-D2,1-D2,5-D2	2	P00687,Q9JHY3
119	18-D2,22-D2,2-D2,3-D2,5-D2	19-D2,20-D2,21-D2,1-D2,4-D2	2	P20060,Q9D3H2
120	18-D2,22-D2,2-D2,4-D2,5-D2	19-D2,20-D2,21-D2,1-D2,3-D2	3	P19221,Q00993,Q9JHY3
121	18-D2,22-D2,3-D2,4-D2,5-D2	19-D2,20-D2,21-D2,1-D2,2-D2	0
122	18-D2,1-D2,2-D2,3-D2,4-D2	19-D2,20-D2,21-D2,22-D2,5-D2	1	Q9ESD1
123	18-D2,1-D2,2-D2,3-D2,5-D2	19-D2,20-D2,21-D2,22-D2,4-D2	1	Q9EP95
124	18-D2,1-D2,2-D2,4-D2,5-D2	19-D2,20-D2,21-D2,22-D2,3-D2	13	O08997,P04186,P05533,P19221,P23780,P25119,P34927,Q07797,Q4KML4,Q61271,Q61847,Q7TMJ8,Q9EP95
125	18-D2,1-D2,3-D2,4-D2,5-D2	19-D2,20-D2,21-D2,22-D2,2-D2	6	O09043,O35657,P05533,P60710;P63260,Q61646,Q921W8
126	18-D2,2-D2,3-D2,4-D2,5-D2	19-D2,20-D2,21-D2,22-D2,1-D2	8	P00687,P0CG49;P0CG50;P62983;P62984,P11589,P13597,Q5FW60,Q60590,Q9EP95,Q9Z0J0
			3.44444

## Sheet: D30
tumor-resected vs tumor-bearing D30
蛋白ID	出现次数
Q61646	11
O55186	10
P0CG49;P0CG50;P62983;P62984	10
Q921I1	9
Q61129	8
Q6NXH9	8
Q9WTR5	8
Q9Z0J0	8
Q9D3H2	8
Q8C6C9	8
P34927	8
O09051	7
P04186	7
P0CW02	7
Q05793	7
Q8VED5	7
Q91X72	7
Q922U2	7
Q9R1E6	7
Q02596	7
P04104	7
P49935	7
Q9JHY4	7
P11588	7
Q62266	7
O35657	7
O89020	7
Q9Z0K7	7
O88968	6
P00687	6
P03953	6
P11276	6
P11589	6
P11591	6
Q61781	6
Q7TMJ8	6
P81117	6
Q91XA9	6
P07759	6
Q9JM99	6
P01665;P01666	6
Q3TTY5	6
P20060	6
Q91X17	6
O08997	5
P29533	5
P47878	5
Q921W8	5
Q9EP95	5
O09159	5
P16675	5
P09470	5
Q08423	5
Q5FW60	5
Q8BND5	5
Q60590	5
A2BIM8;P02762;P04938	5
Q9ESD1	5
Q9Z0M9	5
Q9JI02	5
P25119	4
Q91VW3	4
C0HKG5;C0HKG6	4
P70269	4
P56386	4
Q9ET66	4
Q8BFR4	4
P09803	3
Q61581	3
Q8K4G1	3
P13020	3
P60710;P63260	3
Q91WV7	3
Q00897	3
P19221	3
P11859	3
Q61398	3
P01132	2
Q9JJS0	2
P07758;Q00896	2
P18181	2
P02535	2
P97426	2
P01887	2
A2ARV4	2
Q07456	1
Q4KML4	1
O88338	1
Q01279	1
O54782	1
Q8K1H9	1
P13597	1
P11438	1
P01898	1
Q80X71	1
A2AEP0	0
O08677	0
O09043	0
O09114	0
O09133	0
O70570	0
O88188	0
P00688	0
P01837	0
P02816	0
P04925	0
P05533	0
P06869	0
P07309	0
P07361	0
P07724	0
P08228	0
P09036	0
P10605	0
P13634	0
P15947	0
P17047	0
P18761	0
P20918	0
P22599	0
P23780	0
P28798	0
P28825	0
P35459	0
P41272	0
P49183	0
P51437	0
P55292	0
P70699	0
P97300	0
Q00898	0
Q00993	0
Q01339	0
Q02819	0
Q03404	0
Q06890	0
Q07797	0
Q60847	0
Q61147	0
Q61207	0
Q61271	0
Q61838	0
Q61847	0
Q64729	0
Q6PDN3	0
Q7TMR0	0
Q8R242	0
Q91V08	0
Q91WR8	0
Q9DAU7	0
Q9ET22	0
Q9JHY3	0
Q9JLB4	0

## Sheet: D30(2)
tumor-resected vs tumor-bearing D30
随机组合情况	Group1	Group2	按照条件筛选后的差异的个数	差异蛋白ID
1	18-D3,19-D3,20-D3,21-D3,22-D3	1-D3,2-D3,3-D3,4-D3,5-D3	33	O08997,O09051,O55186,O88968,P00687,P01132,P03953,P04186,P09803,P0CW02,P11276,P11589,P11591,P25119,P29533,P47878,Q05793,Q07456,Q4KML4,Q61129,Q61581,Q61646,Q61781,Q6NXH9,Q8K4G1,Q8VED5,Q91VW3,Q91X72,Q921W8,Q922U2,Q9EP95,Q9JJS0,Q9WTR5
2	18-D3,19-D3,20-D3,21-D3,1-D3	22-D3,2-D3,3-D3,4-D3,5-D3	8	O09051,O55186,P00687,P13020,Q61129,Q61646,Q91X72,Q9Z0J0
3	18-D3,19-D3,20-D3,21-D3,2-D3	22-D3,1-D3,3-D3,4-D3,5-D3	3	O09051,P0CW02,Q91X72
4	18-D3,19-D3,20-D3,21-D3,3-D3	22-D3,1-D3,2-D3,4-D3,5-D3	6	O09159,P00687,Q61646,Q7TMJ8,Q91X72,Q9R1E6
5	18-D3,19-D3,20-D3,21-D3,4-D3	22-D3,1-D3,2-D3,3-D3,5-D3	2	O09051,Q61646
6	18-D3,19-D3,20-D3,21-D3,5-D3	22-D3,1-D3,2-D3,3-D3,4-D3	1	Q91X72
7	18-D3,19-D3,20-D3,22-D3,1-D3	21-D3,2-D3,3-D3,4-D3,5-D3	6	P0CW02,P81117,Q02596,Q91XA9,Q9EP95,Q9Z0J0
8	18-D3,19-D3,20-D3,22-D3,2-D3	21-D3,1-D3,3-D3,4-D3,5-D3	8	C0HKG5;C0HKG6,P04104,P0CW02,P49935,P60710;P63260,P70269,Q05793,Q8VED5
9	18-D3,19-D3,20-D3,22-D3,3-D3	21-D3,1-D3,2-D3,4-D3,5-D3	6	P07758;Q00896,P0CW02,P11276,Q05793,Q7TMJ8,Q91WV7
10	18-D3,19-D3,20-D3,22-D3,4-D3	21-D3,1-D3,2-D3,3-D3,5-D3	6	O09051,P03953,P07759,Q05793,Q9EP95,Q9JM99
11	18-D3,19-D3,20-D3,22-D3,5-D3	21-D3,1-D3,2-D3,3-D3,4-D3	6	P47878,P81117,Q00897,Q05793,Q7TMJ8,Q9JHY4
12	18-D3,19-D3,20-D3,1-D3,2-D3	21-D3,22-D3,3-D3,4-D3,5-D3	0
13	18-D3,19-D3,20-D3,1-D3,3-D3	21-D3,22-D3,2-D3,4-D3,5-D3	1	O09159
14	18-D3,19-D3,20-D3,1-D3,4-D3	21-D3,22-D3,2-D3,3-D3,5-D3	1	O88338
15	18-D3,19-D3,20-D3,1-D3,5-D3	21-D3,22-D3,2-D3,3-D3,4-D3	2	P13020,P81117
16	18-D3,19-D3,20-D3,2-D3,3-D3	21-D3,22-D3,1-D3,4-D3,5-D3	1	Q9D3H2
17	18-D3,19-D3,20-D3,2-D3,4-D3	21-D3,22-D3,1-D3,3-D3,5-D3	1	O09051
18	18-D3,19-D3,20-D3,2-D3,5-D3	21-D3,22-D3,1-D3,3-D3,4-D3	0
19	18-D3,19-D3,20-D3,3-D3,4-D3	21-D3,22-D3,1-D3,2-D3,5-D3	6	P01665;P01666,P11588,Q01279,Q62266,Q8C6C9,Q9JM99
20	18-D3,19-D3,20-D3,3-D3,5-D3	21-D3,22-D3,1-D3,2-D3,4-D3	4	O35657,P16675,Q7TMJ8,Q8C6C9
21	18-D3,19-D3,20-D3,4-D3,5-D3	21-D3,22-D3,1-D3,2-D3,3-D3	0
22	18-D3,19-D3,21-D3,22-D3,1-D3	20-D3,2-D3,3-D3,4-D3,5-D3	28	O55186,O88968,O89020,P00687,P03953,P04104,P04186,P09470,P0CW02,P11589,P11591,P29533,Q08423,Q5FW60,Q61129,Q61646,Q61781,Q6NXH9,Q8BND5,Q8C6C9,Q8VED5,Q91X72,Q91XA9,Q921I1,Q921W8,Q922U2,Q9Z0J0,Q9Z0K7
23	18-D3,19-D3,21-D3,22-D3,2-D3	20-D3,1-D3,3-D3,4-D3,5-D3	12	O89020,P04104,P0CW02,P11276,P29533,Q3TTY5,Q61129,Q61646,Q61781,Q6NXH9,Q8VED5,Q922U2
24	18-D3,19-D3,21-D3,22-D3,3-D3	20-D3,1-D3,2-D3,4-D3,5-D3	9	O09159,P00687,P07759,P11276,Q05793,Q61646,Q91VW3,Q91WV7,Q9WTR5
25	18-D3,19-D3,21-D3,22-D3,4-D3	20-D3,1-D3,2-D3,3-D3,5-D3	10	O09051,O88968,P03953,P07759,P47878,P56386,Q05793,Q61129,Q61646,Q91VW3
26	18-D3,19-D3,21-D3,22-D3,5-D3	20-D3,1-D3,2-D3,3-D3,4-D3	4	P29533,P47878,Q61129,Q91VW3
27	18-D3,19-D3,21-D3,1-D3,2-D3	20-D3,22-D3,3-D3,4-D3,5-D3	1	O89020
28	18-D3,19-D3,21-D3,1-D3,3-D3	20-D3,22-D3,2-D3,4-D3,5-D3	3	O09159,P00687,Q61646
29	18-D3,19-D3,21-D3,1-D3,4-D3	20-D3,22-D3,2-D3,3-D3,5-D3	2	Q61129,Q61646
30	18-D3,19-D3,21-D3,1-D3,5-D3	20-D3,22-D3,2-D3,3-D3,4-D3	3	P49935,Q61129,Q921I1
31	18-D3,19-D3,21-D3,2-D3,3-D3	20-D3,22-D3,1-D3,4-D3,5-D3	0
32	18-D3,19-D3,21-D3,2-D3,4-D3	20-D3,22-D3,1-D3,3-D3,5-D3	0
33	18-D3,19-D3,21-D3,2-D3,5-D3	20-D3,22-D3,1-D3,3-D3,4-D3	0
34	18-D3,19-D3,21-D3,3-D3,4-D3	20-D3,22-D3,1-D3,2-D3,5-D3	2	P0CG49;P0CG50;P62983;P62984,Q61646
35	18-D3,19-D3,21-D3,3-D3,5-D3	20-D3,22-D3,1-D3,2-D3,4-D3	3	O35657,Q60590,Q7TMJ8
36	18-D3,19-D3,21-D3,4-D3,5-D3	20-D3,22-D3,1-D3,2-D3,3-D3	0
37	18-D3,19-D3,22-D3,1-D3,2-D3	20-D3,21-D3,3-D3,4-D3,5-D3	7	O54782,O89020,P04104,Q6NXH9,Q91XA9,Q922U2,Q9Z0J0
38	18-D3,19-D3,22-D3,1-D3,3-D3	20-D3,21-D3,2-D3,4-D3,5-D3	2	O09159,Q91XA9
39	18-D3,19-D3,22-D3,1-D3,4-D3	20-D3,21-D3,2-D3,3-D3,5-D3	1	Q91XA9
40	18-D3,19-D3,22-D3,1-D3,5-D3	20-D3,21-D3,2-D3,3-D3,4-D3	3	P81117,Q91XA9,Q9Z0J0
41	18-D3,19-D3,22-D3,2-D3,3-D3	20-D3,21-D3,1-D3,4-D3,5-D3	1	Q9D3H2
42	18-D3,19-D3,22-D3,2-D3,4-D3	20-D3,21-D3,1-D3,3-D3,5-D3	0
43	18-D3,19-D3,22-D3,2-D3,5-D3	20-D3,21-D3,1-D3,3-D3,4-D3	0
44	18-D3,19-D3,22-D3,3-D3,4-D3	20-D3,21-D3,1-D3,2-D3,5-D3	6	P07758;Q00896,P07759,P0CG49;P0CG50;P62983;P62984,Q62266,Q91WV7,Q9ET66
45	18-D3,19-D3,22-D3,3-D3,5-D3	20-D3,21-D3,1-D3,2-D3,4-D3	2	P19221,Q7TMJ8
46	18-D3,19-D3,22-D3,4-D3,5-D3	20-D3,21-D3,1-D3,2-D3,3-D3	3	P07759,P47878,Q00897
47	18-D3,19-D3,1-D3,2-D3,3-D3	20-D3,21-D3,22-D3,4-D3,5-D3	0
48	18-D3,19-D3,1-D3,2-D3,4-D3	20-D3,21-D3,22-D3,3-D3,5-D3	0
49	18-D3,19-D3,1-D3,2-D3,5-D3	20-D3,21-D3,22-D3,3-D3,4-D3	1	P18181
50	18-D3,19-D3,1-D3,3-D3,4-D3	20-D3,21-D3,22-D3,2-D3,5-D3	1	P0CG49;P0CG50;P62983;P62984
51	18-D3,19-D3,1-D3,3-D3,5-D3	20-D3,21-D3,22-D3,2-D3,4-D3	1	O35657
52	18-D3,19-D3,1-D3,4-D3,5-D3	20-D3,21-D3,22-D3,2-D3,3-D3	1	P49935
53	18-D3,19-D3,2-D3,3-D3,4-D3	20-D3,21-D3,22-D3,1-D3,5-D3	6	O55186,P01665;P01666,P20060,Q02596,Q62266,Q9Z0K7
54	18-D3,19-D3,2-D3,3-D3,5-D3	20-D3,21-D3,22-D3,1-D3,4-D3	3	O35657,P16675,Q9D3H2
55	18-D3,19-D3,2-D3,4-D3,5-D3	20-D3,21-D3,22-D3,1-D3,3-D3	0
56	18-D3,19-D3,3-D3,4-D3,5-D3	20-D3,21-D3,22-D3,1-D3,2-D3	6	O35657,P0CG49;P0CG50;P62983;P62984,P11588,Q3TTY5,Q62266,Q8C6C9
57	18-D3,20-D3,21-D3,22-D3,1-D3	19-D3,2-D3,3-D3,4-D3,5-D3	26	A2BIM8;P02762;P04938,O55186,O88968,P03953,P09470,P09803,P11588,P11589,P11591,P11859,P20060,P34927,Q02596,Q08423,Q3TTY5,Q5FW60,Q61781,Q62266,Q8BND5,Q8C6C9,Q921I1,Q921W8,Q922U2,Q9EP95,Q9Z0J0,Q9Z0K7
58	18-D3,20-D3,21-D3,22-D3,2-D3	19-D3,1-D3,3-D3,4-D3,5-D3	14	P02535,P04104,P0CG49;P0CG50;P62983;P62984,P11276,P11588,P11591,P49935,P70269,Q3TTY5,Q61781,Q6NXH9,Q8K4G1,Q8VED5,Q9JJS0
59	18-D3,20-D3,21-D3,22-D3,3-D3	19-D3,1-D3,2-D3,4-D3,5-D3	4	P11276,P18181,Q08423,Q8K4G1
60	18-D3,20-D3,21-D3,22-D3,4-D3	19-D3,1-D3,2-D3,3-D3,5-D3	7	A2BIM8;P02762;P04938,O88968,P03953,Q8BFR4,Q9EP95,Q9ESD1,Q9Z0M9
61	18-D3,20-D3,21-D3,22-D3,5-D3	19-D3,1-D3,2-D3,3-D3,4-D3	7	O55186,P09803,P11589,P20060,P34927,Q9JHY4,Q9Z0K7
62	18-D3,20-D3,21-D3,1-D3,2-D3	19-D3,22-D3,3-D3,4-D3,5-D3	3	P0CG49;P0CG50;P62983;P62984,P19221,Q62266
63	18-D3,20-D3,21-D3,1-D3,3-D3	19-D3,22-D3,2-D3,4-D3,5-D3	0
64	18-D3,20-D3,21-D3,1-D3,4-D3	19-D3,22-D3,2-D3,3-D3,5-D3	2	Q8K1H9,Q9JI02
65	18-D3,20-D3,21-D3,1-D3,5-D3	19-D3,22-D3,2-D3,3-D3,4-D3	4	O55186,P20060,Q921I1,Q9Z0K7
66	18-D3,20-D3,21-D3,2-D3,3-D3	19-D3,22-D3,1-D3,4-D3,5-D3	0
67	18-D3,20-D3,21-D3,2-D3,4-D3	19-D3,22-D3,1-D3,3-D3,5-D3	2	P01665;P01666,P19221
68	18-D3,20-D3,21-D3,2-D3,5-D3	19-D3,22-D3,1-D3,3-D3,4-D3	1	P0CG49;P0CG50;P62983;P62984
69	18-D3,20-D3,21-D3,3-D3,4-D3	19-D3,22-D3,1-D3,2-D3,5-D3	1	P01665;P01666
70	18-D3,20-D3,21-D3,3-D3,5-D3	19-D3,22-D3,1-D3,2-D3,4-D3	0
71	18-D3,20-D3,21-D3,4-D3,5-D3	19-D3,22-D3,1-D3,2-D3,3-D3	0
72	18-D3,20-D3,22-D3,1-D3,2-D3	19-D3,21-D3,3-D3,4-D3,5-D3	8	C0HKG5;C0HKG6,P0CG49;P0CG50;P62983;P62984,P70269,P81117,Q3TTY5,Q60590,Q61398,Q9Z0J0
73	18-D3,20-D3,22-D3,1-D3,3-D3	19-D3,21-D3,2-D3,4-D3,5-D3	1	P11859
74	18-D3,20-D3,22-D3,1-D3,4-D3	19-D3,21-D3,2-D3,3-D3,5-D3	6	P11859,P34927,Q02596,Q60590,Q9JI02,Q9Z0M9
75	18-D3,20-D3,22-D3,1-D3,5-D3	19-D3,21-D3,2-D3,3-D3,4-D3	9	O55186,P20060,P34927,P81117,P97426,Q02596,Q9JHY4,Q9Z0J0,Q9Z0K7
76	18-D3,20-D3,22-D3,2-D3,3-D3	19-D3,21-D3,1-D3,4-D3,5-D3	4	C0HKG5;C0HKG6,P49935,Q61398,Q9D3H2
77	18-D3,20-D3,22-D3,2-D3,4-D3	19-D3,21-D3,1-D3,3-D3,5-D3	2	P49935,Q60590
78	18-D3,20-D3,22-D3,2-D3,5-D3	19-D3,21-D3,1-D3,3-D3,4-D3	4	C0HKG5;C0HKG6,P0CG49;P0CG50;P62983;P62984,P70269,Q9JHY4
79	18-D3,20-D3,22-D3,3-D3,4-D3	19-D3,21-D3,1-D3,2-D3,5-D3	2	P13597,Q9ET66
80	18-D3,20-D3,22-D3,3-D3,5-D3	19-D3,21-D3,1-D3,2-D3,4-D3	2	O89020,Q9JHY4
81	18-D3,20-D3,22-D3,4-D3,5-D3	19-D3,21-D3,1-D3,2-D3,3-D3	3	Q00897,Q9JHY4,Q9Z0M9
82	18-D3,20-D3,1-D3,2-D3,3-D3	19-D3,21-D3,22-D3,4-D3,5-D3	1	P56386
83	18-D3,20-D3,1-D3,2-D3,4-D3	19-D3,21-D3,22-D3,3-D3,5-D3	1	Q9JI02
84	18-D3,20-D3,1-D3,2-D3,5-D3	19-D3,21-D3,22-D3,3-D3,4-D3	3	P0CG49;P0CG50;P62983;P62984,P56386,Q9WTR5
85	18-D3,20-D3,1-D3,3-D3,4-D3	19-D3,21-D3,22-D3,2-D3,5-D3	1	Q9JI02
86	18-D3,20-D3,1-D3,3-D3,5-D3	19-D3,21-D3,22-D3,2-D3,4-D3	0
87	18-D3,20-D3,1-D3,4-D3,5-D3	19-D3,21-D3,22-D3,2-D3,3-D3	3	P97426,Q9JI02,Q9WTR5
88	18-D3,20-D3,2-D3,3-D3,4-D3	19-D3,21-D3,22-D3,1-D3,5-D3	3	P01665;P01666,P04186,Q9D3H2
89	18-D3,20-D3,2-D3,3-D3,5-D3	19-D3,21-D3,22-D3,1-D3,4-D3	2	P04186,Q9D3H2
90	18-D3,20-D3,2-D3,4-D3,5-D3	19-D3,21-D3,22-D3,1-D3,3-D3	2	P04186,Q9WTR5
91	18-D3,20-D3,3-D3,4-D3,5-D3	19-D3,21-D3,22-D3,1-D3,2-D3	7	O89020,P01887,P04104,P04186,Q6NXH9,Q8C6C9,Q922U2
92	18-D3,21-D3,22-D3,1-D3,2-D3	19-D3,20-D3,3-D3,4-D3,5-D3	20	A2BIM8;P02762;P04938,O35657,O89020,P02535,P04104,P09470,P11588,P11589,P11591,Q3TTY5,Q5FW60,Q61781,Q62266,Q6NXH9,Q8BND5,Q8C6C9,Q8VED5,Q921I1,Q922U2,Q9JM99
93	18-D3,21-D3,22-D3,1-D3,3-D3	19-D3,20-D3,2-D3,4-D3,5-D3	5	A2BIM8;P02762;P04938,Q08423,Q8BND5,Q921I1,Q9ESD1
94	18-D3,21-D3,22-D3,1-D3,4-D3	19-D3,20-D3,2-D3,3-D3,5-D3	11	A2BIM8;P02762;P04938,O88968,P09470,P16675,P34927,Q5FW60,Q8BFR4,Q8BND5,Q921I1,Q9ESD1,Q9Z0M9
95	18-D3,21-D3,22-D3,1-D3,5-D3	19-D3,20-D3,2-D3,3-D3,4-D3	14	O55186,P09470,P11588,P11589,P11591,P20060,P34927,Q02596,Q08423,Q5FW60,Q8C6C9,Q921I1,Q9JM99,Q9Z0K7
96	18-D3,21-D3,22-D3,2-D3,3-D3	19-D3,20-D3,1-D3,4-D3,5-D3	1	Q6NXH9
97	18-D3,21-D3,22-D3,2-D3,4-D3	19-D3,20-D3,1-D3,3-D3,5-D3	3	O35657,Q8BFR4,Q9R1E6
98	18-D3,21-D3,22-D3,2-D3,5-D3	19-D3,20-D3,1-D3,3-D3,4-D3	1	P11588
99	18-D3,21-D3,22-D3,3-D3,4-D3	19-D3,20-D3,1-D3,2-D3,5-D3	3	P07759,Q8BFR4,Q9ESD1
100	18-D3,21-D3,22-D3,3-D3,5-D3	19-D3,20-D3,1-D3,2-D3,4-D3	1	Q9JHY4
101	18-D3,21-D3,22-D3,4-D3,5-D3	19-D3,20-D3,1-D3,2-D3,3-D3	3	P34927,P56386,Q9ESD1
102	18-D3,21-D3,1-D3,2-D3,3-D3	19-D3,20-D3,22-D3,4-D3,5-D3	0
103	18-D3,21-D3,1-D3,2-D3,4-D3	19-D3,20-D3,22-D3,3-D3,5-D3	1	P16675
104	18-D3,21-D3,1-D3,2-D3,5-D3	19-D3,20-D3,22-D3,3-D3,4-D3	1	Q9JM99
105	18-D3,21-D3,1-D3,3-D3,4-D3	19-D3,20-D3,22-D3,2-D3,5-D3	0
106	18-D3,21-D3,1-D3,3-D3,5-D3	19-D3,20-D3,22-D3,2-D3,4-D3	2	P60710;P63260,Q921I1
107	18-D3,21-D3,1-D3,4-D3,5-D3	19-D3,20-D3,22-D3,2-D3,3-D3	1	P49935
108	18-D3,21-D3,2-D3,3-D3,4-D3	19-D3,20-D3,22-D3,1-D3,5-D3	2	P01665;P01666,Q02596
109	18-D3,21-D3,2-D3,3-D3,5-D3	19-D3,20-D3,22-D3,1-D3,4-D3	0
110	18-D3,21-D3,2-D3,4-D3,5-D3	19-D3,20-D3,22-D3,1-D3,3-D3	0
111	18-D3,21-D3,3-D3,4-D3,5-D3	19-D3,20-D3,22-D3,1-D3,2-D3	1	P60710;P63260
112	18-D3,22-D3,1-D3,2-D3,3-D3	19-D3,20-D3,21-D3,4-D3,5-D3	1	Q61398
113	18-D3,22-D3,1-D3,2-D3,4-D3	19-D3,20-D3,21-D3,3-D3,5-D3	4	A2ARV4,P16675,Q60590,Q9R1E6
114	18-D3,22-D3,1-D3,2-D3,5-D3	19-D3,20-D3,21-D3,3-D3,4-D3	2	Q9JM99,Q9R1E6
115	18-D3,22-D3,1-D3,3-D3,4-D3	19-D3,20-D3,21-D3,2-D3,5-D3	0
116	18-D3,22-D3,1-D3,3-D3,5-D3	19-D3,20-D3,21-D3,2-D3,4-D3	0
117	18-D3,22-D3,1-D3,4-D3,5-D3	19-D3,20-D3,21-D3,2-D3,3-D3	4	P34927,Q91X17,Q9R1E6,Q9Z0M9
118	18-D3,22-D3,2-D3,3-D3,4-D3	19-D3,20-D3,21-D3,1-D3,5-D3	3	P13020,Q9D3H2,Q9ET66
119	18-D3,22-D3,2-D3,3-D3,5-D3	19-D3,20-D3,21-D3,1-D3,4-D3	1	Q9D3H2
120	18-D3,22-D3,2-D3,4-D3,5-D3	19-D3,20-D3,21-D3,1-D3,3-D3	2	Q91X17,Q9R1E6
121	18-D3,22-D3,3-D3,4-D3,5-D3	19-D3,20-D3,21-D3,1-D3,2-D3	2	Q91X17,Q9ET66
122	18-D3,1-D3,2-D3,3-D3,4-D3	19-D3,20-D3,21-D3,22-D3,5-D3	3	A2ARV4,O08997,P25119
123	18-D3,1-D3,2-D3,3-D3,5-D3	19-D3,20-D3,21-D3,22-D3,4-D3	3	O08997,P25119,Q61581
124	18-D3,1-D3,2-D3,4-D3,5-D3	19-D3,20-D3,21-D3,22-D3,3-D3	4	O08997,Q91X17,Q9R1E6,Q9WTR5
125	18-D3,1-D3,3-D3,4-D3,5-D3	19-D3,20-D3,21-D3,22-D3,2-D3	7	O08997,P11438,P25119,Q8VED5,Q91X17,Q921W8,Q9WTR5
126	18-D3,2-D3,3-D3,4-D3,5-D3	19-D3,20-D3,21-D3,22-D3,1-D3	12	O55186,P01132,P01887,P01898,P04186,P29533,Q61581,Q80X71,Q91X17,Q91X72,Q921W8,Q9WTR5
			3.76984

## Sheet: tumor-resected vs HC-D30
tumor-resected vs health control-D30
蛋白ID	出现次数
P07361	10
Q61781	9
P34927	9
P51437	9
O55186	8
Q922U2	8
P0CG49;P0CG50;P62983;P62984	8
Q8C6C9	8
O35657	8
Q3TTY5	8
Q6NXH9	8
Q7TMJ8	8
P07759	8
P13020	8
Q9Z0K7	8
P11859	8
Q91WR8	7
O88968	7
P11591	7
P04186	7
P16675	7
Q4KML4	7
Q8VED5	7
O88338	7
Q00898	7
O09159	7
O89020	7
Q8BND5	7
P0CW02	6
P11276	6
P60710;P63260	6
Q05793	6
Q08423	6
Q5FW60	6
C0HKG5;C0HKG6	6
P04104	6
P08228	6
P70269	6
Q61646	6
Q9JHY3	6
P49935	6
P20060	6
O09051	6
Q9JI02	6
Q01279	6
P00687	5
P11589	5
P81117	5
Q9JJS0	5
Q9Z0J0	5
P35459	5
Q61271	5
O08997	5
P11588	5
Q02819	5
Q9JLB4	5
P01887	4
P29533	4
Q62266	4
P11438	4
Q9Z0M9	4
Q9JHY4	4
P02535	4
Q9ESD1	4
Q02596	4
A2BIM8;P02762;P04938	4
P06869	3
P09803	3
Q60590	3
Q61129	3
Q8R242	3
Q8K1H9	3
P09036	3
Q61398	3
Q9D3H2	3
P07758;Q00896	3
P09470	3
P19221	3
O09133	3
Q91VW3	2
Q61147	2
P18761	2
Q91X72	2
Q8K4G1	2
Q91WV7	2
Q64729	1
Q921I1	1
Q9ET66	1
Q61847	1
A2AEP0	1
P07309	1
P23780	1
P47878	1
P13597	1
P17047	1
A2ARV4	0
O08677	0
O09043	0
O09114	0
O54782	0
O70570	0
O88188	0
P00688	0
P01132	0
P01665;P01666	0
P01837	0
P01898	0
P02816	0
P03953	0
P04925	0
P05533	0
P07724	0
P10605	0
P13634	0
P15947	0
P18181	0
P20918	0
P22599	0
P25119	0
P28798	0
P28825	0
P41272	0
P49183	0
P55292	0
P56386	0
P70699	0
P97300	0
P97426	0
Q00897	0
Q00993	0
Q01339	0
Q03404	0
Q06890	0
Q07456	0
Q07797	0
Q60847	0
Q61207	0
Q61581	0
Q61838	0
Q6PDN3	0
Q7TMR0	0
Q80X71	0
Q8BFR4	0
Q91V08	0
Q91X17	0
Q91XA9	0
Q921W8	0
Q9DAU7	0
Q9EP95	0
Q9ET22	0
Q9JM99	0
Q9R1E6	0
Q9WTR5	0

## Sheet: tumor-resected vs HC-D30(2)
tumor-resected vs health control-D30
随机组合情况	Group1	Group2	按照条件筛选后的差异的个数	差异蛋白ID
1	D3-23,D3-24,D3-25,D3-26,D3-27	1-D3,2-D3,3-D3,4-D3,5-D3	8	O55186,P06869,P0CW02,P11276,P60710;P63260,Q05793,Q91WR8,Q922U2
2	D3-23,D3-24,D3-25,D3-26,1-D3	D3-27,2-D3,3-D3,4-D3,5-D3	24	O88968,P00687,P01887,P06869,P07361,P09803,P0CG49;P0CG50;P62983;P62984,P0CW02,P11589,P11591,P29533,P81117,Q08423,Q5FW60,Q60590,Q61129,Q61781,Q62266,Q8C6C9,Q8R242,Q91VW3,Q922U2,Q9JJS0,Q9Z0J0
3	D3-23,D3-24,D3-25,D3-26,2-D3	D3-27,1-D3,3-D3,4-D3,5-D3	25	C0HKG5;C0HKG6,O35657,P04104,P04186,P07361,P08228,P0CG49;P0CG50;P62983;P62984,P0CW02,P11438,P35459,P60710;P63260,P70269,Q3TTY5,Q60590,Q61271,Q61646,Q61781,Q62266,Q64729,Q6NXH9,Q7TMJ8,Q91WR8,Q922U2,Q9JHY3,Q9JJS0
4	D3-23,D3-24,D3-25,D3-26,3-D3	D3-27,1-D3,2-D3,4-D3,5-D3	8	P00687,P06869,P07759,P0CW02,P11276,P13020,Q91WR8,Q9JJS0
5	D3-23,D3-24,D3-25,D3-26,4-D3	D3-27,1-D3,2-D3,3-D3,5-D3	10	O35657,O88968,P07361,P07759,P08228,P13020,P16675,Q60590,Q9JJS0,Q9Z0M9
6	D3-23,D3-24,D3-25,D3-26,5-D3	D3-27,1-D3,2-D3,3-D3,4-D3	8	P04186,P07361,P09803,P0CW02,P81117,Q61646,Q91WR8,Q9JHY4
7	D3-23,D3-24,D3-25,D3-27,1-D3	D3-26,2-D3,3-D3,4-D3,5-D3	7	P04104,Q4KML4,Q61147,Q61781,Q6NXH9,Q8VED5,Q922U2
8	D3-23,D3-24,D3-25,D3-27,2-D3	D3-26,1-D3,3-D3,4-D3,5-D3	12	C0HKG5;C0HKG6,P02535,P04104,P11276,P35459,Q3TTY5,Q61781,Q6NXH9,Q8VED5,Q91WR8,Q922U2,Q9JHY3
9	D3-23,D3-24,D3-25,D3-27,3-D3	D3-26,1-D3,2-D3,4-D3,5-D3	4	O08997,P11276,Q05793,Q91WR8
10	D3-23,D3-24,D3-25,D3-27,4-D3	D3-26,1-D3,2-D3,3-D3,5-D3	3	Q05793,Q8K1H9,Q9ESD1
11	D3-23,D3-24,D3-25,D3-27,5-D3	D3-26,1-D3,2-D3,3-D3,4-D3	1	Q9JHY4
12	D3-23,D3-24,D3-25,1-D3,2-D3	D3-26,D3-27,3-D3,4-D3,5-D3	21	C0HKG5;C0HKG6,O35657,P02535,P04104,P08228,P09036,P0CG49;P0CG50;P62983;P62984,P0CW02,P11438,P11588,P18761,P70269,Q3TTY5,Q61398,Q61781,Q62266,Q6NXH9,Q7TMJ8,Q8R242,Q8VED5,Q922U2
13	D3-23,D3-24,D3-25,1-D3,3-D3	D3-26,D3-27,2-D3,4-D3,5-D3	5	Q61398,Q61781,Q6NXH9,Q8VED5,Q922U2
14	D3-23,D3-24,D3-25,1-D3,4-D3	D3-26,D3-27,2-D3,3-D3,5-D3	8	O88338,P07361,P16675,Q3TTY5,Q61781,Q8K1H9,Q9ESD1,Q9Z0M9
15	D3-23,D3-24,D3-25,1-D3,5-D3	D3-26,D3-27,2-D3,3-D3,4-D3	1	P81117
16	D3-23,D3-24,D3-25,2-D3,3-D3	D3-26,D3-27,1-D3,4-D3,5-D3	18	C0HKG5;C0HKG6,P02535,P04104,P04186,P08228,P11276,P11438,P13020,P35459,P49935,Q00898,Q3TTY5,Q61398,Q61781,Q6NXH9,Q8VED5,Q91WR8,Q9D3H2
17	D3-23,D3-24,D3-25,2-D3,4-D3	D3-26,D3-27,1-D3,3-D3,5-D3	18	C0HKG5;C0HKG6,O35657,P02535,P04186,P07361,P07759,P08228,P13020,P16675,P35459,P49935,Q00898,Q3TTY5,Q61781,Q6NXH9,Q7TMJ8,Q921I1,Q9JHY3
18	D3-23,D3-24,D3-25,2-D3,5-D3	D3-26,D3-27,1-D3,3-D3,4-D3	9	C0HKG5;C0HKG6,P04104,P04186,P08228,P0CG49;P0CG50;P62983;P62984,P35459,P70269,Q61646,Q6NXH9
19	D3-23,D3-24,D3-25,3-D3,4-D3	D3-26,D3-27,1-D3,2-D3,5-D3	8	P07758;Q00896,P07759,P13020,Q00898,Q8K1H9,Q91X72,Q9ESD1,Q9ET66
20	D3-23,D3-24,D3-25,3-D3,5-D3	D3-26,D3-27,1-D3,2-D3,4-D3	2	P04186,Q00898
21	D3-23,D3-24,D3-25,4-D3,5-D3	D3-26,D3-27,1-D3,2-D3,3-D3	6	P04186,P07361,P07759,Q00898,Q61847,Q9ESD1
22	D3-23,D3-24,D3-26,D3-27,1-D3	D3-25,2-D3,3-D3,4-D3,5-D3	3	O09159,O55186,P20060
23	D3-23,D3-24,D3-26,D3-27,2-D3	D3-25,1-D3,3-D3,4-D3,5-D3	1	O09051
24	D3-23,D3-24,D3-26,D3-27,3-D3	D3-25,1-D3,2-D3,4-D3,5-D3	6	A2AEP0,O08997,O09159,P11276,Q05793,Q8K4G1
25	D3-23,D3-24,D3-26,D3-27,4-D3	D3-25,1-D3,2-D3,3-D3,5-D3	2	O09051,Q05793
26	D3-23,D3-24,D3-26,D3-27,5-D3	D3-25,1-D3,2-D3,3-D3,4-D3	3	O55186,P07309,P20060
27	D3-23,D3-24,D3-26,1-D3,2-D3	D3-25,D3-27,3-D3,4-D3,5-D3	4	P01887,P29533,Q62266,Q8C6C9
28	D3-23,D3-24,D3-26,1-D3,3-D3	D3-25,D3-27,2-D3,4-D3,5-D3	4	O09159,P00687,P01887,Q08423
29	D3-23,D3-24,D3-26,1-D3,4-D3	D3-25,D3-27,2-D3,3-D3,5-D3	0
30	D3-23,D3-24,D3-26,1-D3,5-D3	D3-25,D3-27,2-D3,3-D3,4-D3	0
31	D3-23,D3-24,D3-26,2-D3,3-D3	D3-25,D3-27,1-D3,4-D3,5-D3	1	Q9D3H2
32	D3-23,D3-24,D3-26,2-D3,4-D3	D3-25,D3-27,1-D3,3-D3,5-D3	0
33	D3-23,D3-24,D3-26,2-D3,5-D3	D3-25,D3-27,1-D3,3-D3,4-D3	1	Q61646
34	D3-23,D3-24,D3-26,3-D3,4-D3	D3-25,D3-27,1-D3,2-D3,5-D3	1	P07759
35	D3-23,D3-24,D3-26,3-D3,5-D3	D3-25,D3-27,1-D3,2-D3,4-D3	0
36	D3-23,D3-24,D3-26,4-D3,5-D3	D3-25,D3-27,1-D3,2-D3,3-D3	0
37	D3-23,D3-24,D3-27,1-D3,2-D3	D3-25,D3-26,3-D3,4-D3,5-D3	2	O89020,Q922U2
38	D3-23,D3-24,D3-27,1-D3,3-D3	D3-25,D3-26,2-D3,4-D3,5-D3	0
39	D3-23,D3-24,D3-27,1-D3,4-D3	D3-25,D3-26,2-D3,3-D3,5-D3	2	O09051,Q4KML4
40	D3-23,D3-24,D3-27,1-D3,5-D3	D3-25,D3-26,2-D3,3-D3,4-D3	1	P20060
41	D3-23,D3-24,D3-27,2-D3,3-D3	D3-25,D3-26,1-D3,4-D3,5-D3	8	O08997,P09470,P34927,Q02596,Q02819,Q9D3H2,Q9JI02,Q9Z0K7
42	D3-23,D3-24,D3-27,2-D3,4-D3	D3-25,D3-26,1-D3,3-D3,5-D3	2	O09051,Q08423
43	D3-23,D3-24,D3-27,2-D3,5-D3	D3-25,D3-26,1-D3,3-D3,4-D3	2	P11859,Q9JI02
44	D3-23,D3-24,D3-27,3-D3,4-D3	D3-25,D3-26,1-D3,2-D3,5-D3	9	O08997,P07758;Q00896,P11591,Q01279,Q05793,Q61271,Q9JLB4,Q9Z0J0,Q9Z0K7
45	D3-23,D3-24,D3-27,3-D3,5-D3	D3-25,D3-26,1-D3,2-D3,4-D3	2	O08997,Q9JI02
46	D3-23,D3-24,D3-27,4-D3,5-D3	D3-25,D3-26,1-D3,2-D3,3-D3	0
47	D3-23,D3-24,1-D3,2-D3,3-D3	D3-25,D3-26,D3-27,4-D3,5-D3	0
48	D3-23,D3-24,1-D3,2-D3,4-D3	D3-25,D3-26,D3-27,3-D3,5-D3	2	Q3TTY5,Q7TMJ8
49	D3-23,D3-24,1-D3,2-D3,5-D3	D3-25,D3-26,D3-27,3-D3,4-D3	1	Q01279
50	D3-23,D3-24,1-D3,3-D3,4-D3	D3-25,D3-26,D3-27,2-D3,5-D3	0
51	D3-23,D3-24,1-D3,3-D3,5-D3	D3-25,D3-26,D3-27,2-D3,4-D3	0
52	D3-23,D3-24,1-D3,4-D3,5-D3	D3-25,D3-26,D3-27,2-D3,3-D3	0
53	D3-23,D3-24,2-D3,3-D3,4-D3	D3-25,D3-26,D3-27,1-D3,5-D3	5	O55186,P13020,P34927,P49935,Q02596
54	D3-23,D3-24,2-D3,3-D3,5-D3	D3-25,D3-26,D3-27,1-D3,4-D3	3	P11859,P34927,Q9JI02
55	D3-23,D3-24,2-D3,4-D3,5-D3	D3-25,D3-26,D3-27,1-D3,3-D3	1	P11859
56	D3-23,D3-24,3-D3,4-D3,5-D3	D3-25,D3-26,D3-27,1-D3,2-D3	2	O89020,P07758;Q00896
57	D3-23,D3-25,D3-26,D3-27,1-D3	D3-24,2-D3,3-D3,4-D3,5-D3	2	O55186,P60710;P63260
58	D3-23,D3-25,D3-26,D3-27,2-D3	D3-24,1-D3,3-D3,4-D3,5-D3	1	P60710;P63260
59	D3-23,D3-25,D3-26,D3-27,3-D3	D3-24,1-D3,2-D3,4-D3,5-D3	0
60	D3-23,D3-25,D3-26,D3-27,4-D3	D3-24,1-D3,2-D3,3-D3,5-D3	0
61	D3-23,D3-25,D3-26,D3-27,5-D3	D3-24,1-D3,2-D3,3-D3,4-D3	1	Q9JHY4
62	D3-23,D3-25,D3-26,1-D3,2-D3	D3-24,D3-27,3-D3,4-D3,5-D3	5	P09036,P29533,P60710;P63260,Q01279,Q61271
63	D3-23,D3-25,D3-26,1-D3,3-D3	D3-24,D3-27,2-D3,4-D3,5-D3	2	P00687,Q08423
64	D3-23,D3-25,D3-26,1-D3,4-D3	D3-24,D3-27,2-D3,3-D3,5-D3	3	O88338,Q9JI02,Q9Z0M9
65	D3-23,D3-25,D3-26,1-D3,5-D3	D3-24,D3-27,2-D3,3-D3,4-D3	2	P81117,Q02596
66	D3-23,D3-25,D3-26,2-D3,3-D3	D3-24,D3-27,1-D3,4-D3,5-D3	0
67	D3-23,D3-25,D3-26,2-D3,4-D3	D3-24,D3-27,1-D3,3-D3,5-D3	0
68	D3-23,D3-25,D3-26,2-D3,5-D3	D3-24,D3-27,1-D3,3-D3,4-D3	2	Q01279,Q61646
69	D3-23,D3-25,D3-26,3-D3,4-D3	D3-24,D3-27,1-D3,2-D3,5-D3	2	O89020,P07759
70	D3-23,D3-25,D3-26,3-D3,5-D3	D3-24,D3-27,1-D3,2-D3,4-D3	2	O89020,Q8BND5
71	D3-23,D3-25,D3-26,4-D3,5-D3	D3-24,D3-27,1-D3,2-D3,3-D3	0
72	D3-23,D3-25,D3-27,1-D3,2-D3	D3-24,D3-26,3-D3,4-D3,5-D3	0
73	D3-23,D3-25,D3-27,1-D3,3-D3	D3-24,D3-26,2-D3,4-D3,5-D3	2	P51437,Q4KML4
74	D3-23,D3-25,D3-27,1-D3,4-D3	D3-24,D3-26,2-D3,3-D3,5-D3	1	Q4KML4
75	D3-23,D3-25,D3-27,1-D3,5-D3	D3-24,D3-26,2-D3,3-D3,4-D3	3	P20060,P51437,Q4KML4
76	D3-23,D3-25,D3-27,2-D3,3-D3	D3-24,D3-26,1-D3,4-D3,5-D3	1	P49935
77	D3-23,D3-25,D3-27,2-D3,4-D3	D3-24,D3-26,1-D3,3-D3,5-D3	0
78	D3-23,D3-25,D3-27,2-D3,5-D3	D3-24,D3-26,1-D3,3-D3,4-D3	1	Q8BND5
79	D3-23,D3-25,D3-27,3-D3,4-D3	D3-24,D3-26,1-D3,2-D3,5-D3	3	P11591,Q8C6C9,Q9Z0K7
80	D3-23,D3-25,D3-27,3-D3,5-D3	D3-24,D3-26,1-D3,2-D3,4-D3	4	P19221,Q7TMJ8,Q8BND5,Q8C6C9
81	D3-23,D3-25,D3-27,4-D3,5-D3	D3-24,D3-26,1-D3,2-D3,3-D3	1	P01887
82	D3-23,D3-25,1-D3,2-D3,3-D3	D3-24,D3-26,D3-27,4-D3,5-D3	0
83	D3-23,D3-25,1-D3,2-D3,4-D3	D3-24,D3-26,D3-27,3-D3,5-D3	2	O88338,Q3TTY5
84	D3-23,D3-25,1-D3,2-D3,5-D3	D3-24,D3-26,D3-27,3-D3,4-D3	3	P09036,P81117,Q01279
85	D3-23,D3-25,1-D3,3-D3,4-D3	D3-24,D3-26,D3-27,2-D3,5-D3	1	O88338
86	D3-23,D3-25,1-D3,3-D3,5-D3	D3-24,D3-26,D3-27,2-D3,4-D3	1	O09051
87	D3-23,D3-25,1-D3,4-D3,5-D3	D3-24,D3-26,D3-27,2-D3,3-D3	2	O88338,Q8K4G1
88	D3-23,D3-25,2-D3,3-D3,4-D3	D3-24,D3-26,D3-27,1-D3,5-D3	6	O55186,P13020,P20060,P34927,P49935,Q00898
89	D3-23,D3-25,2-D3,3-D3,5-D3	D3-24,D3-26,D3-27,1-D3,4-D3	2	O09051,Q8BND5
90	D3-23,D3-25,2-D3,4-D3,5-D3	D3-24,D3-26,D3-27,1-D3,3-D3	2	O09159,Q8BND5
91	D3-23,D3-25,3-D3,4-D3,5-D3	D3-24,D3-26,D3-27,1-D3,2-D3	5	O89020,Q00898,Q8BND5,Q8C6C9,Q91X72
92	D3-23,D3-26,D3-27,1-D3,2-D3	D3-24,D3-25,3-D3,4-D3,5-D3	0
93	D3-23,D3-26,D3-27,1-D3,3-D3	D3-24,D3-25,2-D3,4-D3,5-D3	2	O09159,P51437
94	D3-23,D3-26,D3-27,1-D3,4-D3	D3-24,D3-25,2-D3,3-D3,5-D3	0
95	D3-23,D3-26,D3-27,1-D3,5-D3	D3-24,D3-25,2-D3,3-D3,4-D3	5	O55186,P13020,P20060,P49935,P51437
96	D3-23,D3-26,D3-27,2-D3,3-D3	D3-24,D3-25,1-D3,4-D3,5-D3	4	O88338,Q02819,Q91WV7,Q9Z0K7
97	D3-23,D3-26,D3-27,2-D3,4-D3	D3-24,D3-25,1-D3,3-D3,5-D3	0
98	D3-23,D3-26,D3-27,2-D3,5-D3	D3-24,D3-25,1-D3,3-D3,4-D3	1	P23780
99	D3-23,D3-26,D3-27,3-D3,4-D3	D3-24,D3-25,1-D3,2-D3,5-D3	7	P0CG49;P0CG50;P62983;P62984,P11588,P11591,P70269,Q91WV7,Q9JLB4,Q9Z0K7
100	D3-23,D3-26,D3-27,3-D3,5-D3	D3-24,D3-25,1-D3,2-D3,4-D3	6	A2BIM8;P02762;P04938,O35657,P11588,P16675,Q5FW60,Q7TMJ8
101	D3-23,D3-26,D3-27,4-D3,5-D3	D3-24,D3-25,1-D3,2-D3,3-D3	4	P11438,P11588,P47878,Q8VED5
102	D3-23,D3-26,1-D3,2-D3,3-D3	D3-24,D3-25,D3-27,4-D3,5-D3	1	O09159
103	D3-23,D3-26,1-D3,2-D3,4-D3	D3-24,D3-25,D3-27,3-D3,5-D3	0
104	D3-23,D3-26,1-D3,2-D3,5-D3	D3-24,D3-25,D3-27,3-D3,4-D3	3	P13597,P17047,Q01279
105	D3-23,D3-26,1-D3,3-D3,4-D3	D3-24,D3-25,D3-27,2-D3,5-D3	1	O09159
106	D3-23,D3-26,1-D3,3-D3,5-D3	D3-24,D3-25,D3-27,2-D3,4-D3	1	Q9JHY3
107	D3-23,D3-26,1-D3,4-D3,5-D3	D3-24,D3-25,D3-27,2-D3,3-D3	0
108	D3-23,D3-26,2-D3,3-D3,4-D3	D3-24,D3-25,D3-27,1-D3,5-D3	1	P34927
109	D3-23,D3-26,2-D3,3-D3,5-D3	D3-24,D3-25,D3-27,1-D3,4-D3	2	P16675,Q61147
110	D3-23,D3-26,2-D3,4-D3,5-D3	D3-24,D3-25,D3-27,1-D3,3-D3	0
111	D3-23,D3-26,3-D3,4-D3,5-D3	D3-24,D3-25,D3-27,1-D3,2-D3	3	O89020,P18761,Q8VED5
112	D3-23,D3-27,1-D3,2-D3,3-D3	D3-24,D3-25,D3-26,4-D3,5-D3	3	P07361,P51437,Q02819
113	D3-23,D3-27,1-D3,2-D3,4-D3	D3-24,D3-25,D3-26,3-D3,5-D3	0
114	D3-23,D3-27,1-D3,2-D3,5-D3	D3-24,D3-25,D3-26,3-D3,4-D3	2	P07759,P51437
115	D3-23,D3-27,1-D3,3-D3,4-D3	D3-24,D3-25,D3-26,2-D3,5-D3	8	P0CG49;P0CG50;P62983;P62984,P11591,P51437,P70269,Q4KML4,Q61271,Q61646,Q9JLB4
116	D3-23,D3-27,1-D3,3-D3,5-D3	D3-24,D3-25,D3-26,2-D3,4-D3	7	O35657,P07361,P16675,P19221,P51437,Q7TMJ8,Q9JHY3
117	D3-23,D3-27,1-D3,4-D3,5-D3	D3-24,D3-25,D3-26,2-D3,3-D3	3	P51437,Q4KML4,Q9JJS0
118	D3-23,D3-27,2-D3,3-D3,4-D3	D3-24,D3-25,D3-26,1-D3,5-D3	17	O09133,P09470,P09803,P0CG49;P0CG50;P62983;P62984,P11589,P11591,P11859,P34927,Q02596,Q02819,Q08423,Q5FW60,Q61129,Q8C6C9,Q9JLB4,Q9Z0J0,Q9Z0K7
119	D3-23,D3-27,2-D3,3-D3,5-D3	D3-24,D3-25,D3-26,1-D3,4-D3	18	A2BIM8;P02762;P04938,O09133,O35657,O88338,O88968,P07361,P09470,P11589,P11859,P16675,P34927,Q02819,Q5FW60,Q61129,Q8BND5,Q9JI02,Q9Z0K7,Q9Z0M9
120	D3-23,D3-27,2-D3,4-D3,5-D3	D3-24,D3-25,D3-26,1-D3,3-D3	6	A2BIM8;P02762;P04938,O88968,P00687,P11589,P11859,Q08423
121	D3-23,D3-27,3-D3,4-D3,5-D3	D3-24,D3-25,D3-26,1-D3,2-D3	22	A2BIM8;P02762;P04938,O09133,O35657,O88968,O89020,P0CG49;P0CG50;P62983;P62984,P11588,P11589,P11591,P11859,P19221,P29533,P70269,Q5FW60,Q61271,Q7TMJ8,Q8C6C9,Q8R242,Q91VW3,Q9JLB4,Q9Z0J0,Q9Z0K7
122	D3-23,1-D3,2-D3,3-D3,4-D3	D3-24,D3-25,D3-26,D3-27,5-D3	2	P34927,Q9JHY4
123	D3-23,1-D3,2-D3,3-D3,5-D3	D3-24,D3-25,D3-26,D3-27,4-D3	1	O88968
124	D3-23,1-D3,2-D3,4-D3,5-D3	D3-24,D3-25,D3-26,D3-27,3-D3	0
125	D3-23,1-D3,3-D3,4-D3,5-D3	D3-24,D3-25,D3-26,D3-27,2-D3	2	P60710;P63260,Q9JHY3
126	D3-23,2-D3,3-D3,4-D3,5-D3	D3-24,D3-25,D3-26,D3-27,1-D3	7	O55186,O88968,P11859,P34927,Q5FW60,Q8C6C9,Q9Z0J0
			3.76984
